# Supplementary material
Source: PubMed Central journal article supplement (PMC2805743)
Supplement: 2009.010298_1.pdf [file 2009.010298_1.pdf]

# Gene expression markers for genetic risk groups and survival in chronic lymphocytic leukemia

Dirk Kienle,<sup>1</sup> Axel Benner,<sup>2</sup> Carolin Läufler,<sup>1</sup> Dirk Winkler,<sup>1</sup> Christof Schneider,<sup>1</sup> Andreas Bühler,<sup>1</sup> Thorsten Zenz,<sup>1</sup> Annett Habermann,<sup>1</sup> Ulrich Jäger,<sup>3</sup> Peter Lichter,<sup>4</sup> Riccardo Dalla-Favera,<sup>5</sup> Hartmut Döhner,<sup>1</sup> and Stephan Stilgenbauer<sup>1</sup>

<sup>1</sup>Department of Internal Medicine III, University of Ulm, Germany; <sup>2</sup>Division of Biostatistics, German Cancer Research Center (DKFZ), Heidelberg, Germany; <sup>3</sup>Department of Internal Medicine I, Medical University of Vienna, Vienna, Austria; <sup>4</sup>Division of Molecular Genetics, DKFZ Heidelberg, Germany, and <sup>5</sup>Institute for Cancer Genetics, Department of Pathology and Genetics and Development, Columbia University, NY, USA

Citation: Kienle D, Benner A, Läufler C, Winkler D, Schneider C, Bühler A, Zenz T, Habermann A, Jäger U, Lichter P, Dalla-Favera R, Döhner H, and Stilgenbauer S. Gene expression markers for genetic risk groups and survival in chronic lymphocytic leukemia. *Haematologica* 2009; doi:10.3324/haematol.2009.010298

©2010 Ferrata Storti Foundation. This is an open-access paper.

**Online Supplementary Table 1.** Candidate gene characteristics, primer sequences, references, and expression pattern in non-B-cells. For: forward primer; Rev: reverse primer. ABI: Applied Biosystems (Weiterstadt, Germany).

| Gene Symbol | Chromosomal localization | Putative function                                        | Assay ID / Primer sequence                                                          | Primer reference                                      | Selection criterion                                                                          | Overexpressed in Non-B-cells * | Investigated in CD19+ purified cohort |
|-------------|--------------------------|----------------------------------------------------------|-------------------------------------------------------------------------------------|-------------------------------------------------------|----------------------------------------------------------------------------------------------|--------------------------------|---------------------------------------|
| ADAM29      | 4q34                     | cell-cell / cell-matrix interactions                     | for:CAATACTCCTGTGATCGTATAA<br>rev:CACTGCTCCTTTCCACTGC                               | adopted from van't Veer <i>et al.</i> , <sup>30</sup> | overexpression in VH mutated CLL (Oppezso <i>et al.</i> ) <sup>22</sup>                      | no                             | yes                                   |
| ATM         | 11q22-q23                | DNA damage and cell cycle control                        | Hs00175892_m1                                                                       | ABI                                                   | differential expression in 11q- CLL (Kienle <i>et al.</i> ) <sup>28</sup>                    | no                             | yes                                   |
| CLLU1       | 12q22                    | disease-specific expression                              | for:AGCTTGCAGATGGCAGATCA<br>rev:CATAAAGGGCAGCGAAATGC<br>probe:TATCTCCAGGCCTTTCATTGG | adopted from Buhl <i>et al.</i> ) <sup>20</sup>       | disease-specific overexpression (Buhl <i>et al.</i> ) <sup>19,20</sup>                       | yes                            | yes                                   |
| DMD         | Xp21.2                   | cytoskeletal protein                                     | Hs00187905_m1                                                                       | ABI                                                   | overexpression in VH unmutated CLL (Rosenwald <i>et al.</i> ) <sup>16</sup>                  | no                             | yes                                   |
| GLO1        | 6p21.3-p21.1             | enzyme in glutathione metabolism                         | Hs00198702_m1                                                                       | ABI                                                   | overexpression in VH unmutated <sup>18</sup>                                                 | no                             | no                                    |
| HCLS1 (HS1) | 3q13                     | transcription factor                                     | Hs00232048_m1                                                                       | ABI                                                   | phosphorylated form overexpressed in VH unmutated CLL (Scielzo <i>et al.</i> ) <sup>25</sup> | yes                            | yes                                   |
| KIAA0977    | 2q24.3                   | unknown                                                  | Hs00383292_m1                                                                       | ABI                                                   | overexpressed in VH mutated CLL ( <i>personal communication</i> )*                           | no                             | yes                                   |
| LPL         | 8p22                     | enzyme in triglyceride and lipoprotein metabolism        | Hs00173425_m1                                                                       | ABI                                                   | overexpression in VH unmutated CLL (Oppezso <i>et al.</i> ) <sup>22</sup>                    | yes                            | yes                                   |
| MGC9913     | 19q13.43                 | unknown                                                  | Hs.23133                                                                            | SuperArray                                            | overexpression in VH mutated CLL (Haslinger <i>et al.</i> ) <sup>18</sup>                    | no                             | yes                                   |
| PCDH9       | 13q14.3-q21.1            | neuronal receptor, signal transduction                   | Hs.492696                                                                           | SuperArray                                            | overexpression in VH mutated CLL (Haslinger <i>et al.</i> ) <sup>18</sup>                    | no                             | no                                    |
| PEG10       | 7q21                     | negative regulator of TGF-β pathway                      | Hs01122880                                                                          | ABI                                                   | overexpression in high risk CLL <sup>26</sup>                                                | no                             | no                                    |
| SEPT10      | 2q13                     | cytoskeletal protein with GTPase activity                | Hs00376351_g1                                                                       | ABI                                                   | overexpressed in VH unmutated CLL ( <i>personal communication R. D.-F.</i> )                 | yes                            | yes                                   |
| TCF7        | 5q31.1                   | Wnt signaling pathway                                    | Hs00175273_m1                                                                       | ABI                                                   | overexpression in VH mutated CLL <sup>18</sup>                                               | yes                            | yes                                   |
| TCL1        | 14q32.1T-                | and B-lymphocyte differentiation                         | Hs00951350_m1                                                                       | ABI                                                   | potential pathogenic relevance <sup>23,24</sup>                                              | no                             | yes                                   |
| TP53        | 17p13.1                  | induction of apoptosis, cell cycle arrest and DNA repair | Hs00153349_m1                                                                       | ABI                                                   | differential expression in 17p- CLL <sup>28</sup>                                            | no                             |                                       |
| VIM         | 10p13                    | intermediate filament (mesenchymal tissue)               | Hs00185584_m1                                                                       | ABI                                                   | prognostic factor <sup>27</sup>                                                              | yes                            | yes                                   |
| ZAP70       | 2q12                     | T-cell receptor signaling                                | Hs00277148_m1                                                                       | ABI                                                   | overexpression in VH unmutated CLL <sup>10-13</sup>                                          | yes                            | yes                                   |
| ZNF2        | 2q11.2                   | transcription factor                                     | Hs00368338_m1                                                                       | ABI                                                   | overexpression in VH unmutated <sup>18</sup>                                                 | yes                            | yes                                   |

\*defined as at least equal median expression level in the CD19 negative fraction of healthy donors compared to the positive fraction, or in the CD19 negative fraction of CLL patients compared to the positive fraction.

**Online Supplementary Table 2.** Associations between gene expression and genetic subgroups in unpurified patient samples. Only genes with a significant association after adjustment of *p* values are shown (adjusted *p*<0.05), ordered by strength of association.

| Marker                  | AUC      | Dadjusted p |
|-------------------------|----------|-------------|
| <b>VH unmutated</b>     |          |             |
| LPL                     | 0.827    | <0.001      |
| TCF7                    | 0.211    | <0.001      |
| ADAM29                  | 0.273    | 0.001       |
| DMD                     | 0.721    | 0.002       |
| KIAA0977                | 0.283    | 0.002       |
| MGC9913                 | 0.692    | 0.007       |
| SEPT10                  | 0.668    | 0.030       |
| ATM                     | 0.342    | 0.049       |
| <b>11q-</b>             |          |             |
| ATM                     | 0.176    | 0.001       |
| HS1                     | 0.263    | 0.029       |
| <b>Overall survival</b> |          |             |
| TCF7                    | -3.314 * | 0.010       |

*AUC: estimated area under the ROC curve. The AUC gives the strength and direction of association; values > 0.5: high expression is associated with the respective genetic feature, values < 0.5: low expression is associated with the respective genetic feature. Value of 1 or 0: maximal association. Negative Wald statistics: high expression is associated with prolonged survival times. No significant associations were observed for the 17p- subgroup and V3-21 usage. \*Wald test statistics.*

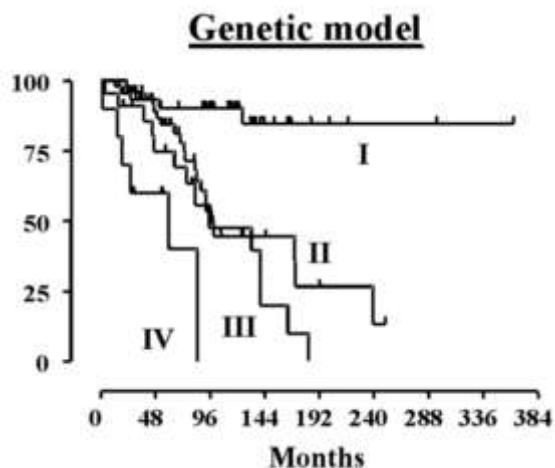

**Online Supplementary Figure 1.** Overall survival curve (Kaplan-Meier) according to the hierarchical genetic model (Kröber et al. (7)). I. VH mutated without V3-21, 11q-, 17p-; II. VH unmutated / V3-21 usage without 11q-, 17p-; III. 11q- without 17p-; IV. 17p-. Median OS subgroup I: undefined, II: 97 months, III: 95 months, IV: 59 months.

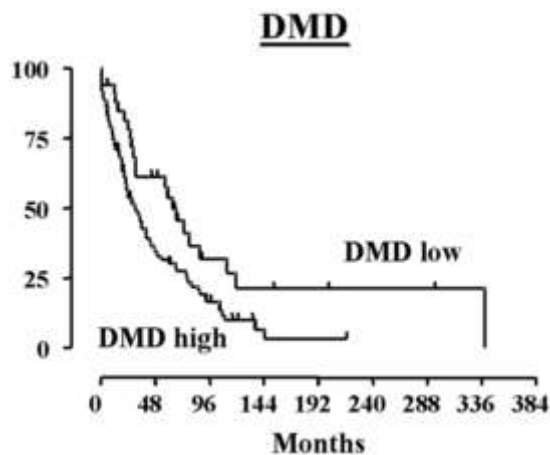

**Online Supplementary Figure 2.** Treatment-free survival curves (Kaplan-Meier) according to DMD expression. Median TFS for low expressers: 63 months, high expressers: 30 months.

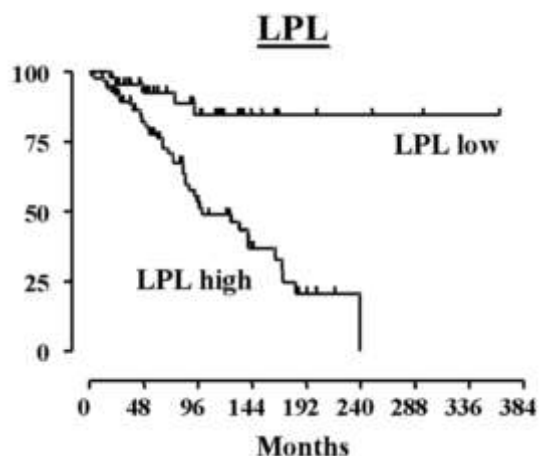

**Online Supplementary Figure 3.** Overall survival curves (Kaplan-Meier) according to LPL expression. Median OS for low expressers: undefined, high expressers: 99 months.
